# Supplementary material for: Effect on Chest Compression Fraction of Continuous Manual Compressions with Asynchronous Ventilations Using an i-gel® versus 30:2 Approach during Simulated Out-of-Hospital Cardiac Arrest: Protocol for a Manikin Multicenter Randomized Controlled Trial
Source: MDPI journal article supplement (doi:10.3390/healthcare9030354), 2021-03-20
Supplement: s1 [file s1]

## Second questionnaire

|                                                                                                                                                                                                                                                                                                    |                                                                                                                                                                                                                                                                                                  |
|----------------------------------------------------------------------------------------------------------------------------------------------------------------------------------------------------------------------------------------------------------------------------------------------------|--------------------------------------------------------------------------------------------------------------------------------------------------------------------------------------------------------------------------------------------------------------------------------------------------|
| French original version                                                                                                                                                                                                                                                                            | English translated version                                                                                                                                                                                                                                                                       |
| <b>Complété durant le scénario</b>                                                                                                                                                                                                                                                                 | <b>Completed during the scenario</b>                                                                                                                                                                                                                                                             |
| <i>Identifiant de l'équipe</i> (noté sur l'enveloppe)                                                                                                                                                                                                                                              | <i>Team ID</i> (indicated on the envelope)                                                                                                                                                                                                                                                       |
| <i>Tentative réussie</i> <input type="checkbox"/> 1 <input type="checkbox"/> 2 <input type="checkbox"/> 3 <input type="checkbox"/> Échec                                                                                                                                                           | <i>Successful attempt</i> <input type="checkbox"/> 1 <input type="checkbox"/> 2 <input type="checkbox"/> 3 <input type="checkbox"/> Failure                                                                                                                                                      |
| <b>Complété post-scénario</b>                                                                                                                                                                                                                                                                      | <b>Completed post-scénario</b>                                                                                                                                                                                                                                                                   |
| <i>Identifiant de l'équipe</i> (noté sur l'enveloppe)                                                                                                                                                                                                                                              | <i>Team ID</i> (indicated on the envelope)                                                                                                                                                                                                                                                       |
| <p><i>Satisfaction concernant l'approche</i></p> <p><input type="checkbox"/> Pas du tout satisfait</p> <p><input type="checkbox"/> Pas satisfait</p> <p><input type="checkbox"/> Neutre / indéterminé</p> <p><input type="checkbox"/> Satisfait</p> <p><input type="checkbox"/> Très satisfait</p> | <p><i>Satisfaction regarding approach</i></p> <p><input type="checkbox"/> Not satisfied at all</p> <p><input type="checkbox"/> Not satisfied</p> <p><input type="checkbox"/> Neutral / undetermined</p> <p><input type="checkbox"/> Satisfied</p> <p><input type="checkbox"/> Very satisfied</p> |
| <p><i>Charge cognitive</i></p> <p>En utilisant l'échelle de notation, veuillez évaluer la quantité d'effort mental nécessaire pour compléter ce scénario de simulation (entourez).</p>                                                                                                             | <p><i>Cognitive load</i></p> <p>Using the rating scale, please rate the amount of mental effort that was required to complete this simulation scenario (circle).</p>                                                                                                                             |
|                                                                                                                                                                                                                 |                                                                                                                                                                                                              |
