# Supplementary material for: Effect on Chest Compression Fraction of Continuous Manual Compressions with Asynchronous Ventilations Using an i-gel® versus 30:2 Approach during Simulated Out-of-Hospital Cardiac Arrest: Protocol for a Manikin Multicenter Randomized Controlled Trial
Source: MDPI journal article supplement (doi:10.3390/healthcare9030354), 2021-03-20
Supplement: s1 [file s1]

## **Standard Operating Procedure (English version)**

### **Indications and prerequisites**

- ☐ Confirms the i-gel® indication: cardiac arrest
- ☐ Functional suction at hand

### **Preparation of material**

- ☐ Appropriately sized I-GEL®
- ☐ Non-silicone lubricant (type K-Y)
- ☐ Means of attachment (lace, tape, tube holder)
- ☐ EtCO<sub>2</sub> sensor

### **Device insertion**

- ☐ Sufficiently lubricates the i-gel® (except the front part)
- ☐ Continuous chest compressions from the start and during all device insertion
- ☐ Check for the absence of foreign bodies in the mouth before insertion
- ☐ Open the mouth by tilting the head and / or pulling the mandible
- ☐ Performs the insertion of the i-gel® without forcing (positions itself precisely and naturally over the laryngeal structure)
- ☐ Connect the resuscitator with the filter and the EtCO<sub>2</sub> sensor

### **Assessment**

- ☐ Checks the correct placement of the device using capnography, correct it if necessary
- ☐ Ensures the proper functioning of the system and the efficiency of the ventilation

### **Care suite**

- ☐ Performs continuous MCE unless ventilation is inadequate in the absence of interruptions
- ☐ Optional: secure the i-gel® using a means of attachment
- ☐ Optional: place a gastric tube of the appropriate size and ensure its position

### *COVID period adaptations:*

- the protective equipment of the providers must be maximum: at least N95 mask, gloves and eyes protection
- the filter is placed directly on the i-gel® during its preparation
- the rest of the procedure is unchanged
