# Supplementary material for: Effect on Chest Compression Fraction of Continuous Manual Compressions with Asynchronous Ventilations Using an i-gel® versus 30:2 Approach during Simulated Out-of-Hospital Cardiac Arrest: Protocol for a Manikin Multicenter Randomized Controlled Trial
Source: MDPI journal article supplement (doi:10.3390/healthcare9030354), 2021-03-20
Supplement: s1 [file s1]

## First questionnaire

|                                                                                                                               |                                                                                                            |
|-------------------------------------------------------------------------------------------------------------------------------|------------------------------------------------------------------------------------------------------------|
| French original version                                                                                                       | English translated version                                                                                 |
| <b>Complété pré-scénario</b>                                                                                                  | <b>Completed pre-scenario</b>                                                                              |
| <i>Identifiant de l'équipe</i> (noté sur l'enveloppe)                                                                         | <i>Team ID</i> (indicated on the envelope)                                                                 |
| <i>Âge</i> (en années)                                                                                                        | <i>Age</i> (in years)                                                                                      |
| <i>Genre</i> <input type="checkbox"/> Femme <input type="checkbox"/> Homme <input type="checkbox"/> Autre                     | <i>Gender</i> <input type="checkbox"/> Female <input type="checkbox"/> Male <input type="checkbox"/> Other |
| <i>Années d'expériences professionnelles</i>                                                                                  | <i>Years of professional experience</i>                                                                    |
| <i>Titre professionnel</i> <input type="checkbox"/> Ambulancier·ère ES <input type="checkbox"/> Technicien·ne ambulancier·ère | <i>Professional title</i> <input type="checkbox"/> Paramedic <input type="checkbox"/> EMT                  |
| <i>Nombre estimé d'insertions d'i-gel effectuées <u>sur un mannequin</u> au cours de l'année dernière</i>                     | <i>Estimated number of i-gel insertion performed <u>on manikin</u> during last year</i>                    |
| <i>Nombre estimé d'insertions d'i-gel effectuées <u>sur un patient réel</u> au cours de la dernière année</i>                 | <i>Estimated number of i-gel insertion performed <u>on real patient</u> during the last year</i>           |
| <i>Rôle</i> <input type="checkbox"/> Leader <input type="checkbox"/> Équipier                                                 | <i>Role</i> <input type="checkbox"/> Team Leader <input type="checkbox"/> Team Member                      |
