# Supplementary material for: Effect on Chest Compression Fraction of Continuous Manual Compressions with Asynchronous Ventilations Using an i-gel® versus 30:2 Approach during Simulated Out-of-Hospital Cardiac Arrest: Protocol for a Manikin Multicenter Randomized Controlled Trial
Source: MDPI journal article supplement (doi:10.3390/healthcare9030354), 2021-03-20
Supplement: s1 [file s1]

## DISPLAY RESULTS

```
<?php

// Ouvre une session
session_start();

// Connexion à mysql
include("connect.php");

?>
<!DOCTYPE html>
<html>

<head>
    <meta http-equiv="Content-Type" content="text/html; charset=UTF-8" />

    <meta name="title" content="Etude CPR / IGEL" />
    <meta name="description" content="résultats">
    <link rel="stylesheet"
href="https://maxcdn.bootstrapcdn.com/bootstrap/4.0.0/css/bootstrap.min.css"
integrity="sha384-Gn5384xqQ1aowXA+058RXPxPg6fy4IWvTNh0E263XmFcJlSAwiGgFAW/dAiS6J
Xm" crossorigin="anonymous">
</head>

<body>
<?php

// Converti les secondes en hh mm ss
function millisecondsToTime($milliseconds) {
    $seconds = $milliseconds/1000;
    $dtF = new \DateTime('@0');
    $dtT = new \DateTime("@$seconds");
    return $dtF->diff($dtT)->format('%i min, %s sec');
}

// Affiche aux 2 min
$IncrementTime = $_POST['IncrementTime_choix'];
// Temps total
$TotalTimeSession = $_POST['TotalTimeSession_choix'];
// Nom de la table
$table_name = $_POST['table_name_choix'];

echo '<b>Table : '.$table_name.' / Temps de session : '.$TotalTimeSession.' ms
(' .millisecondsToTime($TotalTimeSession).') / Echelle de temps :
'.$IncrementTime.' ms (' .millisecondsToTime($IncrementTime).')</b><p><p>';

// Initialisation des données
$new_time_cpr = 0 ;
$last_time_cpr = 0 ;
$count_cpr_inactivity = 0 ;
$count_cpr_inactivity_total = 0 ;
$time_cpr_inactivity = 0 ;
```

```

$time_cpr_inactivity_total = 0 ;
$first_cpr = 0 ;
$first_vent = 0 ;
$first_vent_inefficace = 0 ;
$first_shock = 0 ;
$count_shock = 0;
$time_shock = 0 ;
$time_shock_moyen = 0 ;
$time_shock_total = 0 ;
$last_time_shock = 0 ;
$last_time_intermediaire = 0 ;
$total_time_total = 0 ;
$ventil_volume_moyen = 0 ;
$ventil_volume_moyen_total = 0 ;
$count_ventil_strong = 0 ;
$count_ventil_strong_total = 0 ;
$count_ventil_weak = 0 ;
$count_ventil_weak_total = 0 ;
$count_ventil = 0 ;
$count_ventil_total = 0 ;
$compDepth_moyen = 0 ;
$compDepth_moyen_total = 0 ;
$count_mce = 0 ;
$count_mce_total = 0 ;
$count_compDepth_weak = 0 ;
$count_compDepth_weak_total = 0 ;
$count_compDepth_strong = 0 ;
$count_compDepth_strong_total = 0 ;
$compReleaseDepth_moyen = 0 ;
$compReleaseDepth_moyen_total = 0 ;
$count_compReleaseDepth = 0 ;
$count_compReleaseDepth_total = 0 ;
$count_compMeanRate_slow = 0 ;
$count_compMeanRate_slow_total = 0 ;
$count_compMeanRate_fast = 0 ;
$count_compMeanRate_fast_total = 0 ;
$compMeanRate_moyen = 0 ;
$compMeanRate_moyen_total = 0 ;
$time_intermediaire = 0 ;

// Recherche liste
$query_cpr='SELECT
            type, msec, type2, value
FROM
            '.$table_name.'
WHERE
            (type = "CprCompEvent" OR type = "CprVentEvent" OR type =
"ShockDelivered") AND (type2 = "endTime" OR type2 = "shockEnergy")
ORDER BY msec';

$result_cpr=$mysqli->query($query_cpr);

while ($myrow_cpr = mysqli_fetch_row($result_cpr)) {

```

```

// Coupe la session à 10 min depuis le 1er message
if ($total_time_total<=$TotalTimeSession) {

    // Définit le temps ZERO du 1er message
    if ($myrow_cpr[0] == 'CprCompEvent') {
        if ($first_cpr==0) {

$first_cpr = $myrow_cpr[1]; }

        }

    // Attribue le temps du message suivant
    if ($myrow_cpr[0] == 'CprCompEvent') {

        $new_time_cpr =

$myrow_cpr[1]-$first_cpr;

        $count_mce=$count_mce+1;

        // Recherche la

profondeur du message

        $query_mce_check='SELECT
            value
        FROM
            '.$table_name.'
        WHERE
            type =
"CprCompEvent" AND type2 = "compDepth" AND msec = "'.$myrow_cpr[1].'"
            ORDER BY msec';

$result_mce_check=$mysqli->query($query_mce_check);

$myrow_mce_check=mysqli_fetch_row($result_mce_check);

        // Calcul les

compressions

        $compDepth_moyen =

$compDepth_moyen+$myrow_mce_check[0];

        // Si compression trop

faible

        if ($myrow_mce_check[0]
< 50) { $count_compDepth_weak = $count_compDepth_weak+1; }

        // Si compression trop

forte

        if ($myrow_mce_check[0]
> 60) { $count_compDepth_strong = $count_compDepth_strong+1; }

        // Recherche le

relâchement du thorax

        $query_mce_check='SELECT
            value
        FROM
            '.$table_name.'
        WHERE

```

```

                                type =
"CprCompEvent" AND type2 = "compReleaseDepth" AND msec = "'. $myrow_cpr[1].'"
                                ORDER BY msec';

$result_mce_check=$mysqli->query($query_mce_check);
$myrow_mce_chech=mysqli_fetch_row($result_mce_check);

                                // Calcul les
relâchements                                $compReleaseDepth_moyen
= $compReleaseDepth_moyen+$myrow_mce_chech[0];

                                // Si pas assez de
relâchement                                if ($myrow_mce_chech[0]
> 5) { $count_compReleaseDepth = $count_compReleaseDepth+1; }

                                // Recherche la
fréquence du message                                $query_mce_check='SELECT
                                                value
FROM
                                                '. $table_name.'
WHERE
                                                type =
"CprCompEvent" AND type2 = "compMeanRate" AND msec = "'. $myrow_cpr[1].'"
                                                ORDER BY msec';

$result_mce_check=$mysqli->query($query_mce_check);
$myrow_mce_chech=mysqli_fetch_row($result_mce_check);

                                // Calcul les fréquences
$compMeanRate_moyen =
$compMeanRate_moyen+$myrow_mce_chech[0];

                                // Si compression trop
faible                                if ($myrow_mce_chech[0]
< 100) { $count_compMeanRate_slow = $count_compMeanRate_slow+1; }
                                // Si compression trop
forte                                if ($myrow_mce_chech[0]
> 120) { $count_compMeanRate_fast= $count_compMeanRate_fast+1; }

                                }

                                // Recherche les ventilations
if ($myrow_cpr[0] == 'CprVentEvent') {

```

```

// Recherche si
ventilation efficace

$query_vent_check='SELECT
                                value
FROM                            '.$table_name.'
WHERE                           type =
"CprVentEvent" AND type2 = "ventVolume" AND msec = "'. $myrow_cpr[1].'"
                                ORDER BY msec';

$result_vent_check=$mysqli->query($query_vent_check);
                                $myrow_vent_check =
mysqli_fetch_row($result_vent_check);

// Recherche si volume
if ($myrow_vent_check[0]
    >= 300 ml
    >= 300) {

    $new_time_vent = $myrow_cpr[1];
                                if
    ($first_vent==0) { $first_vent = $myrow_cpr[1]; }

    $affiche_volume_vent = '<font color="#0000FF">'.$myrow_vent_check[0].'
    ml</font>';
                                } else {

    $new_time_vent_inefficace = $myrow_cpr[1];
                                if
    ($first_vent_inefficace==0) { $first_vent_inefficace = $myrow_cpr[1]; }

    $affiche_volume_vent = '<font color="#800080">'.$myrow_vent_check[0].' ml !!! (<
    300 ml)</font>'; }

// Calcul les volumes

$ventil_volume_moyen=$ventil_volume_moyen+$myrow_vent_check[0];

$count_ventil=$count_ventil+1;

// Si volume trop faible
if ($myrow_vent_check[0]
    < 300) { $count_ventil_weak = $count_ventil_weak+1; }
// Si volume trop fort
if ($myrow_vent_check[0]
    > 700) { $count_ventil_strong = $count_ventil_strong+1; }
    }

// Attribue temps du 1er choc et
additionne les temps des chocs et les compte

```

```

if ($myrow_cpr[0] == 'ShockDelivered') {

    if ($first_shock==0) {
        $first_shock =
$myrow_cpr[1];
        $last_time_shock
= $myrow_cpr[1];
    }

    // Compte les chocs

$count_shock=$count_shock+1;

$count_shock2[$count_shock] = $count_shock;

    // Mémoire le temps de
chaque choc
$time_shock =
$myrow_cpr[1]-$first_cpr;
$time_shock2[$count_shock] = $time_shock;

    // Calcule le temps
entre chaque choc
$time_between_shock =
$myrow_cpr[1] - $last_time_shock;
$time_between_shock2[$count_shock] = $time_between_shock;

    // Calcul le temps total
depuis le 1er choc
$time_shock_total =
$myrow_cpr[1] - $first_shock;
$time_shock_total2[$count_shock] = $time_shock_total ;

    // Mémoire le temps du
choc précédent
$last_time_shock =
$myrow_cpr[1];
}

// Affiche que si demandé dans
formulaire

if (!isset($_POST['Affiche_resume'])) {
    // Affiche tous les
temps
    if
($myrow_cpr[0]!='CprCompEvent' AND $myrow_cpr[0]!='CprVentEvent' AND
$myrow_cpr[0]!='ShockDelivered') { echo '<strike>'; }
    if
($myrow_cpr[0]=='CprVentEvent') { echo '<font color=blue>'; }

```

```

if
($myrow_cpr[0]=='ShockDelivered') { echo '<font color=#FF8C00>'; }
if ($first_cpr>0) {
echo
$myrow_cpr[0].' - ' . ($myrow_cpr[1]-$first_cpr).' ms /
' . (( $myrow_cpr[1]-$first_cpr)/1000).' s / ';

$time_event = ($myrow_cpr[1]-$first_cpr)/1000/60;
echo
number_format($time_event, 2, '.', '').'<br>';

}
if
($myrow_cpr[0]!='CprCompEvent' AND $myrow_cpr[0]!='CprVentEvent' AND
$myrow_cpr[0]!='ShockDelivered') { echo '</strike>'; }
if
($myrow_cpr[0]=='CprVentEvent') {
echo
'</font>';
echo
'<b>'.$affiche_volume_vent.'</b><br>';
}
if
($myrow_cpr[0]=='ShockDelivered') { echo '</font>'; }
}

// Additionne si le temps entre 2
messages est supérieur à 1000 ms
if ((( $last_time_cpr+1000) <
$new_time_cpr) AND ( $first_cpr > 0)) {

$delta_cpr_inactivity =
$new_time_cpr-$last_time_cpr;
if
(!isset($_POST['Affiche_resume'])) { echo '<font color="#FF0000">Delta
'.$delta_cpr_inactivity.' ms / ' . ($delta_cpr_inactivity/1000).' s<br>'; }

$time_cpr_inactivity=$time_cpr_inactivity+$delta_cpr_inactivity;
if
(!isset($_POST['Affiche_resume'])) { echo 'Total : <b>'.$time_cpr_inactivity.'
ms / ' . ($time_cpr_inactivity/1000).' s</b></font><br>'; }
}

// Redéfinit les variables
if ($myrow_cpr[0] == 'CprCompEvent') {
$last_time_cpr =
$myrow_cpr[1]-$first_cpr;
}
$total_time_total=$last_time_cpr;

// Mémoire les temps intermédiaires
if
($time_intermediaire<=$TotalTimeSession AND

```

```

$total_time_total>=$time_intermediaire+$IncrementTime) {

                                                                    $last_time_intermediaire
= $total_time_total - $last_time_intermediaire;
$time_intermediaire2[$time_intermediaire] = $last_time_intermediaire;
                                                                    $last_time_intermediaire
= $total_time_total;
$total_time2[$time_intermediaire] = $total_time_total;

$ventil_volume_moyen2[$time_intermediaire] = $ventil_volume_moyen;
$ventil_volume_moyen_total = $ventil_volume_moyen_total + $ventil_volume_moyen;
                                                                    $ventil_volume_moyen =
0;

$count_ventil2[$time_intermediaire] = $count_ventil;
                                                                    $count_ventil_total =
$count_ventil_total + $count_ventil;
                                                                    $count_ventil = 0 ;

$count_ventil_strong2[$time_intermediaire] = $count_ventil_strong;
$count_ventil_strong_total = $count_ventil_strong_total + $count_ventil_strong;
                                                                    $count_ventil_strong =
0;

$count_ventil_weak2[$time_intermediaire] = $count_ventil_weak;
                                                                    $count_ventil_weak_total
= $count_ventil_weak_total + $count_ventil_weak;
                                                                    $count_ventil_weak = 0;

$compDepth_moyen2[$time_intermediaire] = $compDepth_moyen;
                                                                    $compDepth_moyen_total =
$compDepth_moyen_total + $compDepth_moyen;
                                                                    $compDepth_moyen = 0;

$count_mce2[$time_intermediaire] = $count_mce;
                                                                    $count_mce_total =
$count_mce_total + $count_mce;
                                                                    $count_mce = 0;

$count_compDepth_weak2[$time_intermediaire] = $count_compDepth_weak;
$count_compDepth_weak_total = $count_compDepth_weak_total +

```



```

$count_compDepth_weak;
0;
$count_compDepth_weak =

$count_compDepth_strong2[$time_intermediaire] = $count_compDepth_strong;

$count_compDepth_strong_total = $count_compDepth_strong_total +
$count_compDepth_strong;
$count_compDepth_strong
= 0;

$count_compReleaseDepth2[$time_intermediaire] = $count_compReleaseDepth;

$count_compReleaseDepth_total = $count_compReleaseDepth_total +
$count_compReleaseDepth;
$count_compReleaseDepth
= 0;

$compReleaseDepth_moyen2[$time_intermediaire] = $compReleaseDepth_moyen;

$compReleaseDepth_moyen_total = $compReleaseDepth_moyen_total +
$compReleaseDepth_moyen;
$compReleaseDepth_moyen
= 0;

$compMeanRate_moyen2[$time_intermediaire] = $compMeanRate_moyen;

$compMeanRate_moyen_total = $compMeanRate_moyen_total + $compMeanRate_moyen;
$compMeanRate_moyen = 0;

$count_compMeanRate_slow2[$time_intermediaire] = $count_compMeanRate_slow;

$count_compMeanRate_slow_total = $count_compMeanRate_slow_total +
$count_compMeanRate_slow;
$count_compMeanRate_slow
= 0;

$count_compMeanRate_fast2[$time_intermediaire] = $count_compMeanRate_fast;

$count_compMeanRate_fast_total = $count_compMeanRate_fast_total +
$count_compMeanRate_fast;
$count_compMeanRate_fast
= 0;

$time_cpr_inactivity2[$time_intermediaire] = $time_cpr_inactivity;

$time_cpr_inactivity_total = $time_cpr_inactivity_total + $time_cpr_inactivity;

```

```

                                $time_cpr_inactivity =
0;

$time_intermediaire=$time_intermediaire+$IncrementTime;

                                }

                                }

}
?><p>

<table class="table table-sm">
  <thead class="thead-dark">
    <tr>
      <th scope="col">Temps</th>
      <th scope="col">Temps<br>session<br>(depuis le 1er MCE)</th>
      <th scope="col"><font color="#FF8C00">Temps entre 1er MCE<br>et 1er
choc</th>
      <th scope="col"><font color="#FF8C00">Stats choc</th>
      <th scope="col"><font color="#0000FF">Temps entre 1er MCE<br>et 1ère
ventilation (>300 ml)</th>
      <th scope="col"><font color="#0000FF">Stats ventilation</th>
      <th scope="col"><font color="#FF0000">Stats massage</th>
      <th scope="col"><font color="#FF0000">Total temps NO FLOW<br>(si pause > 1
seconde)</font><br></th>
    </tr>
  </thead>
  <tbody>
    <?php
      // initialisation compteur
      $count_round=0;

      // Affiche les temps intermédiaires
      for ($time_increase = $IncrementTime; $time_increase <=
$TotalTimeSession; $time_increase=$time_increase+$IncrementTime) {
        // Cherche le time d'avant pour afficher les bonnes
données

          $time_intermediaire=$time_increase-$IncrementTime;

          // Incrémente le compteur
          $count_round = $count_round + 1;
          ?>
          <tr>
            <th scope="row"><?php echo '<nobr>->
'.($time_increase/1000/60).' min</nobr>'; ?></th>
            <td><?php
              echo
$time_intermediaire2[$time_intermediaire].'
ms<br>'.($time_intermediaire2[$time_intermediaire]/1000).' s<br>';
              $time_min =
$time_intermediaire2[$time_intermediaire]/1000/60;
              echo number_format($time_min, 2, '.',

```

```

'').' min<br>'; ?></td>
        <td><font color="#FF8C00"><?php
            // Affiche que si dans la tranche de
temps correspondante
            if
($first_shock<$total_time2[$time_intermediaire] AND
$first_shock>($total_time2[$time_intermediaire]-$IncrementTime)) {
                echo
($first_shock-$first_cpr).' ms<br>'.(($first_shock-$first_cpr)/1000).' s<br>';
                $time_min =
($first_shock-$first_cpr)/1000/60;
                echo
number_format($time_min, 2, '.', '').' min<br>';
            } ?></font></td>
        <td><font color="#FF8C00"><?php
            // Affiche les temps intermédiaires
            for ($nb_increase_shock = 1 ;
$nb_increase_shock <= $count_shock2[$count_shock];
$nb_increase_shock=$nb_increase_shock+1) {

                // Affiche que si dans
la tranche de temps correspondante
                if
(($time_shock2[$nb_increase_shock]<$total_time2[$time_intermediaire]) AND
($time_shock2[$nb_increase_shock]>($total_time2[$time_intermediaire]-$IncrementT
ime))) {
                    echo
'<b>Choc '.$count_shock2[$nb_increase_shock].'/</b><br>';
                    echo
($time_shock2[$nb_increase_shock]).'
ms<br>'.(($time_shock2[$nb_increase_shock])/1000).' s<br>';
                    $time_min = ($time_shock2[$nb_increase_shock])/1000/60;
                    echo
number_format($time_min, 2, '.', '').' min<br>';
                    if
(isset($last_shock_time)) {
                        echo 'Temps depuis dernier choc
:<br>'.(($time_between_shock2[$nb_increase_shock])/1000).' s<br>';
                        $time_shock_moyen = $time_shock_moyen+$time_between_shock2[$nb_increase_shock];
                        echo 'Temps moyen entre les chocs
:<br><b>'.number_format((($time_shock_moyen/($count_shock2[$nb_increase_shock]-1
))/1000), 2, '.', '').' s</b><br><br>';
                    }

                    $last_shock_time = $time_shock2[$nb_increase_shock];
                }
            }
        }
    }
}

```

```

?></font></td>
<td><font color="#0000FF"><?php
// Affiche que si dans la tranche de
temps correspondante
if
(($first_vent-$first_cpr)<$total_time2[$time_intermediaire] AND
($first_vent-$first_cpr)>($total_time2[$time_intermediaire]-$IncrementTime)) {
echo
($first_vent-$first_cpr).' ms<br>' . (($first_vent-$first_cpr)/1000).' s<br>';
$time_min =
($first_vent-$first_cpr)/1000/60;
echo
number_format($time_min, 2, '.', '').' min';
} ?></font><br>
<?php
// Affiche que si dans la tranche de
temps correspondante
if
(($first_vent_inefficace-$first_cpr)<$total_time2[$time_intermediaire] AND
($first_vent_inefficace-$first_cpr)>($total_time2[$time_intermediaire]-$IncrementTime)) {
if
($first_vent_inefficace>0 AND !isset($affiche_once)) { ?><i><font
color="#800080">1ère ventilation insuffisante (<300 ml) :<br><?php
echo
($first_vent_inefficace-$first_cpr).'
ms<br>' . (($first_vent_inefficace-$first_cpr)/1000).' s<br>';
$time_min = ($first_vent_inefficace-$first_cpr)/1000/60;
echo
number_format($time_min, 2, '.', '').' min';
echo
'</i></font>';
$affiche_once=1;
}
} ?></td>
<td><font color="#0000FF"><?php
echo
'<b>'.$count_ventil2[$time_intermediaire].' ventilations</b><br> pour un volume
moyen de
'.number_format(($ventil_volume_moyen2[$time_intermediaire]/$count_ventil2[$time_intermediaire]), 2, '.', '').' ml<br>';
echo 'FV :
'.number_format(($count_ventil2[$time_intermediaire]/($time_intermediaire2[$time_intermediaire]/1000/60)), 2, '.', '').'/min<br>'; ?>
<font color="#800080"><?php
echo
$count_ventil_weak2[$time_intermediaire].' ventilations < 300 ml (';
echo
number_format((( $count_ventil_weak2[$time_intermediaire]/$count_ventil2[$time_intermediaire])*100), 2, '.', '').'%<br>';
echo
$count_ventil_strong2[$time_intermediaire].' ventilations > 700 ml (';

```

```

                                echo
number_format(((($count_ventil_strong2[$time_intermediaire]/$count_ventil2[$time_
intermediaire])*100), 2, '.', '').'%')<br>';
                                echo 'Efficacité ventilation :
'.number_format(((($count_ventil2[$time_intermediaire]-($count_ventil_strong2[$ti
me_intermediaire]+$count_ventil_weak2[$time_intermediaire]))/$count_ventil2[$tim
e_intermediaire])*100), 2, '.', '').'%</font>';
                                ?>
                                </font></td>
                                <td><font color="#000000"><?php
                                echo
'<b>'. $count_mce2[$time_intermediaire]. ' messages</b> (FC moyenne :
'.number_format(($count_mce2[$time_intermediaire]/($time_intermediaire2[$time_in
termediaire]/1000/60)), 2, '.', '').' /min) : <br>';
                                echo '<u>Profondeur moyenne</u> :
'.number_format(($compDepth_moyen2[$time_intermediaire]/$count_mce2[$time_interm
ediaire]), 2, '.', '').' mm<br>';
                                echo
'<li>'. $count_compDepth_weak2[$time_intermediaire]. ' messages < 50 mm (';
                                echo
number_format(((($count_compDepth_weak2[$time_intermediaire]/$count_mce2[$time_in
termediaire])*100), 2, '.', '').'%')<br>';
                                echo
'<li><b>'. ($count_mce2[$time_intermediaire]-($count_compDepth_weak2[$time_interm
ediaire]+$count_compDepth_strong2[$time_intermediaire])). ' messages entre 50 mm
et 60 mm (';
                                echo
number_format((((($count_mce2[$time_intermediaire]-($count_compDepth_weak2[$time_
intermediaire]+$count_compDepth_strong2[$time_intermediaire]))/$count_mce2[$time_
intermediaire])*100), 2, '.', '').'%')</b><br>';
                                echo
'<li>'. $count_compDepth_strong2[$time_intermediaire]. ' messages > 60 mm (';
                                echo
number_format(((($count_compDepth_strong2[$time_intermediaire]/$count_mce2[$time_
intermediaire])*100), 2, '.', '').'%')<br>';
                                echo '<u>Relâchement moyen</u> :
'.number_format(($compReleaseDepth_moyen2[$time_intermediaire]/$count_mce2[$time_
intermediaire]), 2, '.', '').' mm<br>';
                                echo
'<li>'. $count_compReleaseDepth2[$time_intermediaire]. ' relâchements insuffisants
(> 5 mm) (';
                                echo
number_format(((($count_compReleaseDepth2[$time_intermediaire]/$count_mce2[$time_
intermediaire])*100), 2, '.', '').'%')<br>';
                                echo '<li>'. '<b>Efficacité
relâchement :
'.number_format(((($count_mce2[$time_intermediaire]-$count_compReleaseDepth2[$tim
e_intermediaire])/ $count_mce2[$time_intermediaire])*100), 2, '.',
'').'%</b><br>';
                                echo '<u>Fréquence moyenne messages</u>
:
'.number_format(($compMeanRate_moyen2[$time_intermediaire]/$count_mce2[$time_int
ermediaire]), 2, '.', '').' /min<br>';
                                echo

```

```

'<li>'.$count_compMeanRate_slow2[$time_intermediaire].' messages < 100/min (';
echo
number_format(((($count_compMeanRate_slow2[$time_intermediaire]/$count_mce2[$time
_intermediaire])*100), 2, '.', '').'%')<br>';
echo
'<li><b>'.($count_mce2[$time_intermediaire]-($count_compMeanRate_slow2[$time_int
ermediaire]+$count_compMeanRate_fast2[$time_intermediaire])).' messages entre
100 et 120/min (';
echo
number_format((((($count_mce2[$time_intermediaire]-($count_compMeanRate_slow2[$ti
me_intermediaire]+$count_compMeanRate_fast2[$time_intermediaire])))/$count_mce2[$
time_intermediaire])*100), 2, '.', '').'%')</b><br>';
echo
'<li>'.$count_compMeanRate_fast2[$time_intermediaire].' messages > 120/min (';
echo
number_format(((($count_compMeanRate_fast2[$time_intermediaire]/$count_mce2[$time
_intermediaire])*100), 2, '.', '').'%')<br>';

?>
</font></td>
<td><font color="#FF0000"><?php
echo
$time_cpr_inactivity2[$time_intermediaire].'
ms<br>'.($time_cpr_inactivity2[$time_intermediaire]/1000).' s';

$total_percent=((($time_intermediaire2[$time_intermediaire]-$time_cpr_inactivity2
[$time_intermediaire])/($time_intermediaire2[$time_intermediaire])*100;
echo '<br>% MCE vs No flow (CCF) :
<b>'.number_format($total_percent, 2, '.', '').'%';
$ccf[$count_round] =
number_format($total_percent, 2, '.', '');
?></b></font></td>

</tr>
<?php
} ?>
</tbody>
</table>

<b>Totaux</b><br>

<table class="table table-sm">
<thead class="thead-dark">
<tr>
<th scope="col">Temps</th>
<th scope="col">Temps<br>session<br>(depuis le 1er MCE)</th>
<th scope="col"><font color="#FF8C00">Temps entre 1er MCE<br>et 1er
choc</th>
<th scope="col"><font color="#FF8C00">Stats choc</th>
<th scope="col"><font color="#0000FF">Temps entre 1er MCE<br>et 1ère
ventilation (>300 ml)</th>
<th scope="col"><font color="#0000FF">Stats ventilation</th>
<th scope="col"><font color="#FF0000">Stats massage</th>
<th scope="col"><font color="#FF0000">Total temps NO FLOW<br>(si pause > 1
seconde)</font><br></th>

```

```

        </tr>
    </thead>
    <tbody>
        <tr>
            <th scope="row"><?php echo number_format(($total_time_total/1000/60),
2, '.', '').' min'; ?></th>
            <td><?php
                echo $total_time_total.'
ms<br>' . ($total_time_total/1000).' s<br>';
                $time_min = $total_time_total/1000/60;
                echo number_format($time_min, 2, '.', '').' min<br>';
            ?></td>
            <td><font color="#FF8C00"><?php
                echo ($first_shock-$first_cpr).'
ms<br>' . (($first_shock-$first_cpr)/1000).' s<br>';
                $time_min = ($first_shock-$first_cpr)/1000/60;
                echo number_format($time_min, 2, '.', '').' min<br>';
            ?></font></td>
            <td><font color="#FF8C00"><?php
                echo '<b>' . $count_shock.' chocs</b><br>';
                echo 'Temps moyen entre les chocs
:<br><b>' . number_format((($time_shock_moyen/($count_shock-1))/1000), 2, '.',
''.)' s</b><br>';
            ?></font></td>
            <td><font color="#0000FF"><?php
                echo ($first_vent-$first_cpr).'
ms<br>' . (($first_vent-$first_cpr)/1000).' s<br>';
                $time_min = ($first_vent-$first_cpr)/1000/60;
                echo number_format($time_min, 2, '.', '').' min';
            ?></font><br>
            <?php
                if ($first_vent_inefficace>0) {
                    ?><i><font color="#800080">1ère
ventilation insuffisante (<300 ml) :<br><?php
                        echo
($first_vent_inefficace-$first_cpr).'
ms<br>' . (($first_vent_inefficace-$first_cpr)/1000).' s<br>';
                        $time_min =
($first_vent_inefficace-$first_cpr)/1000/60;
                        echo number_format($time_min, 2, '.',
'').' min';
                        echo '</i></font>';
                    } ?></td>
            <td><font color="#0000FF"><?php
                echo '<b>' . $count_ventil_total.' ventilations</b><br>
pour un volume moyen de
'.number_format(($ventil_volume_moyen_total/$count_ventil_total), 2, '.', '').'
ml<br>';
                echo 'FV :
'.number_format(($count_ventil_total/($total_time_total/1000/60)), 2, '.',
'').'/min<br>'; ?>
                <font color="#800080"><?php
                    echo $count_ventil_weak_total.' ventilations <
300 ml (';

```

```

                                echo
number_format(((($count_ventil_weak_total/$count_ventil_total)*100), 2, '.',
''.')'%<br>';
                                echo $count_ventil_strong_total.' ventilations >
700 ml (';
                                echo
number_format(((($count_ventil_strong_total/$count_ventil_total)*100), 2, '.',
''.')'%<br>';
                                echo 'Efficacité ventilation :
'.number_format(((($count_ventil_total-($count_ventil_strong_total+$count_ventil_
weak_total))/$count_ventil_total*100), 2, '.', '').')'%</font>';
                                ?>
                                </font></td>
                                <td><font color="#000000"><?php
                                echo '<b>'.$count_mce_total.' messages</b> (FC moyenne :
'.number_format(($count_mce_total/($total_time_total/1000/60)), 2, '.',
''.')'/min) : <br>';
                                echo '<u>Profondeur moyenne</u> :
'.number_format(($compDepth_moyen_total/$count_mce_total), 2, '.', '').'
mm<br>';
                                echo '<li>'.$count_compDepth_weak_total.'
messages < 50 mm (';
                                echo
number_format(((($count_compDepth_weak_total/$count_mce_total)*100), 2, '.',
''.')'%<br>';
                                echo
'<li><b>'.($count_mce_total-($count_compDepth_weak_total+$count_compDepth_strong
_total)).' messages entre 50 mm et 60 mm (';
                                echo
number_format((((($count_mce_total-($count_compDepth_weak_total+$count_compDepth_
strong_total))/$count_mce_total)*100), 2, '.', '').')'%</b><br>';
                                echo '<li>'.$count_compDepth_strong_total.'
messages > 60 mm (';
                                echo
number_format(((($count_compDepth_strong_total/$count_mce_total)*100), 2, '.',
''.')'%<br>';
                                echo '<u>Relâchement moyen</u> :
'.number_format(($compReleaseDepth_moyen_total/$count_mce_total), 2, '.', '').'
mm<br>';
                                echo '<li>'.$count_compReleaseDepth_total.'
relâchements insuffisants (> 5 mm) (';
                                echo
number_format(((($count_compReleaseDepth_total/$count_mce_total)*100), 2, '.',
''.')'%<br>';
                                echo '<li>'.<b>Efficacité relâchement :
'.number_format(((($count_mce_total-$count_compReleaseDepth_total)/$count_mce_tot
al*100), 2, '.', '').')'%</b><br>';
                                echo '<u>Fréquence moyenne messages</u> :
'.number_format(($compMeanRate_moyen_total/$count_mce_total), 2, '.',
''.')'/min<br>';
                                echo '<li>'.$count_compMeanRate_slow_total.'
messages < 100/min (';
                                echo
number_format(((($count_compMeanRate_slow_total/$count_mce_total)*100), 2, '.',

```



```

''. '%><br>';

                                echo
'<li><b>'.($count_mce_total-($count_compMeanRate_slow_total+$count_compMeanRate_
fast_total)).' messages entre 100 et 120/min (';
                                echo
number_format((((($count_mce_total-($count_compMeanRate_slow_total+$count_compMea
nRate_fast_total))/ $count_mce_total)*100), 2, '.', '').'%></b><br>';
                                echo '<li>'. $count_compMeanRate_fast_total.'
messages > 120/min (';
                                echo
number_format((((($count_compMeanRate_fast_total/$count_mce_total)*100), 2, '.',
''). '%><br>';

                                ?>
                                </font></td>
                                <td><font color="#FF0000"><?php
                                echo $time_cpr_inactivity_total.'
ms<br>'.($time_cpr_inactivity_total/1000).' s';

$total_percent=((($total_time_total-$time_cpr_inactivity_total)/$total_time_total
)*100;
                                echo '<br>% MCE vs No flow (CCF) :
<b>'.number_format($total_percent, 2, '.', '').'%';
                                // Valeur pour CSV file
                                $overall_CCF = number_format($total_percent, 2, '.',
'');
                                $CompDepth =
number_format(($compDepth_moyen_total/$count_mce_total), 2, '.', '');
                                $intarget_depth =
number_format((((($count_mce_total-($count_compDepth_weak_total+$count_compDepth_
strong_total))/ $count_mce_total)*100), 2, '.', '');
                                $below_depth =
number_format((((($count_compDepth_weak_total/$count_mce_total)*100), 2, '.', ''));

                                $above_depth =
number_format((((($count_compDepth_strong_total/$count_mce_total)*100), 2, '.',
''));
                                $CompRelease =
number_format((((($count_mce_total-$count_compReleaseDepth_total)/$count_mce_total
*100), 2, '.', ''));
                                $CompFrequency =
number_format(($compMeanRate_moyen_total/$count_mce_total), 2, '.', '');

                                $intarget_frequency =
number_format((((($count_mce_total-($count_compMeanRate_slow_total+$count_compMea
nRate_fast_total))/ $count_mce_total)*100), 2, '.', '');
                                $below_frequency =
number_format((((($count_compMeanRate_slow_total/$count_mce_total)*100), 2, '.',
''));
                                $above_frequency =
number_format((((($count_compMeanRate_fast_total/$count_mce_total)*100), 2, '.',
''));

                                $time_shock_csv = (($first_shock-$first_cpr)/1000);
                                $Nb_shock = $count_shock;
                                $time_ventilation_csv = (($first_vent-$first_cpr)/1000);

```

```

        $Nb_Vent = $count_ventil_total;
        $VentVolume =
number_format(($ventil_volume_moyen_total/$count_ventil_total), 2, '.', '');
        $intarget_volume =
number_format((( $count_ventil_total-($count_ventil_strong_total+$count_ventil_weak_total))/ $count_ventil_total*100), 2, '.', '');
        $below_volume =
number_format((( $count_ventil_weak_total/$count_ventil_total)*100), 2, '.', '');
        $above_volume =
number_format((( $count_ventil_strong_total/$count_ventil_total)*100), 2, '.',
        '');

```

```

        ?></b></font></td>

```

```

    </tr>

```

```

</tbody>

```

```

</table>

```

```

<table border="0" cellspacing="0" bordercolor="#000000" width="100%" summary="">

```

```

    <tr>

```

```

        <form action="export_csv.php" name="affiche_result"
method="post" enctype="multipart/form-data">

```

```

        <td align="center" valign="middle">

```

```

            <input type="hidden" name="count_round"
value="<?php echo $count_round; ?>">

```

```

            <input type="hidden" name="table_name"
value="<?php echo $table_name; ?>">

```

```

            <input type="hidden" name="overall_CCF"
value="<?php echo $overall_CCF; ?>">

```

```

            <?php
            for ($nb_increase_round = 1 ; $nb_increase_round
<= $count_round; $nb_increase_round=$nb_increase_round+1) {
                ?>

```

```

                    <input type="hidden"
name="CCF[<?php echo $nb_increase_round; ?>]" value="<?php echo
$ccf[$nb_increase_round]; ?>">

```

```

                <?php

```

```

            }
            ?>

```

```

            <input type="hidden" name="CompDepth"
value="<?php echo $CompDepth; ?>">

```

```

            <input type="hidden" name="intarget_depth"
value="<?php echo $intarget_depth; ?>">

```

```

            <input type="hidden" name="below_depth"

```

```

value="<?php echo $below_depth; ?>">
    <input type="hidden" name="above_depth"
value="<?php echo $above_depth; ?>">
    <input type="hidden" name="CompRelease"
value="<?php echo $CompRelease; ?>">
    <input type="hidden" name="CompFrequency"
value="<?php echo $CompFrequency; ?>">
    <input type="hidden" name="intarget_frequency"
value="<?php echo $intarget_frequency; ?>">
    <input type="hidden" name="below_frequency"
value="<?php echo $below_frequency; ?>">
    <input type="hidden" name="above_frequency"
value="<?php echo $above_frequency; ?>">
    <input type="hidden" name="time_shock_csv"
value="<?php echo $time_shock_csv; ?>">
    <input type="hidden" name="Nb_shock"
value="<?php echo $Nb_shock; ?>">
    <input type="hidden" name="time_ventilation_csv"
value="<?php echo $time_ventilation_csv; ?>">
    <input type="hidden" name="Nb_Vent" value="<?php
echo $Nb_Vent; ?>">
    <input type="hidden" name="VentVolume"
value="<?php echo $VentVolume; ?>">
    <input type="hidden" name="intarget_volume"
value="<?php echo $intarget_volume; ?>">
    <input type="hidden" name="below_volume"
value="<?php echo $below_volume; ?>">
    <input type="hidden" name="above_volume"
value="<?php echo $above_volume; ?>">

    <input type="radio" name="separation"
value="pointvirgule" checked style="font-size: 8pt;"> Point-virgule
; &nbsp; &nbsp; &nbsp; &nbsp; &nbsp; &nbsp; &nbsp; &nbsp; &nbsp;
    <input type="radio" name="separation"
value="virgule" style="font-size: 8pt;"> Virgule ,
    <br>
    <input type="submit" value="CSV"><p>

```

</td>

</form>

</tr>

<tr>

```

    <form action="index.php" name="affiche_result" method="post"
enctype="multipart/form-data">

```

```
<td align="center" valign="middle">
```

```
<input type="submit" value="RETOUR">
```

```
</td>
```

```
</form>
```

```
</tr>
```

```
</table>
```

```
</body>
```

```
</html>
```

## INDEX

```
<?php
```

```
// Ouvre une session  
session_start();
```

```
// Connexion à mysql  
include("connect.php");
```

```
?>
```

```
<!DOCTYPE html>
```

```
<html>
```

```
<head>
```

```
    <meta http-equiv="Content-Type" content="text/html; charset=UTF-8" />
```

```
    <meta name="title" content="Etude CPR / IGEL" />
```

```
    <meta name="description" content="résultats">
```

```
    <link rel="stylesheet"
```

```
href="https://maxcdn.bootstrapcdn.com/bootstrap/4.0.0/css/bootstrap.min.css"
```

```
integrity="sha384-Gn5384xqQ1aowXA+058RXPxPg6fy4IWvTNh0E263XmFcJlSAwiGgFAW/dAiS6J
```

```
Xm" crossorigin="anonymous">
```

```
</head>
```

```
<body>
```

```
<table border="0" cellspacing="0" width="100%" bordercolor="#000000" summary="">
```

```
    <tr>
```

```
        <form action="affiche_result.php" name="affiche_result"
```

```
method="post" enctype="multipart/form-data">
```

```
        <td align="left" valign="middle">
```

```
            <b>Choisir la simulation :</b><br>
```

```
            <select name="table_name_choix">
```

```
                <?php
```

```
                    // Recherche
```

```
liste
```

```

$query_list_tables='SHOW TABLES FROM ybch_simman_cpr';

$result_list_tables=$mysqli->query($query_list_tables);

($myrow_list_tables = mysqli_fetch_row($result_list_tables)) { while
?><option value="<?php echo $myrow_list_tables[0]; ?>"><?php echo
$myrow_list_tables[0]; ?></option>
                                                                    <?php
                                                                    }
                                                                    ?>

                                                                    </select><p>

                                                                    </td>
                                                                    </tr>
                                                                    <tr>
                                                                    <td align="left" valign="middle">
                                                                    <b>Temps de session (défaut : 10 min :
600 000 msec)</b><BR>
                                                                    <input type="text"
name="TotalTimeSession_choix" size="6" maxlength="6" value="600000"><p>
                                                                    </td>
                                                                    </tr>
                                                                    <tr>
                                                                    <td align="left" valign="middle">
                                                                    <b>Echelle de temps (défaut : 2 min :
120 000 msec)</b><BR>
                                                                    <input type="text"
name="IncrementTime_choix" size="6" maxlength="6" value="120000"><p>
                                                                    </td>
                                                                    </tr>
                                                                    <tr>
                                                                    <td align="left" valign="middle">
                                                                    <input type="checkbox"
name="Affiche_resume" value="oui"> Affiche que les résumés<p>
                                                                    </td>
                                                                    </tr>
                                                                    <tr>
                                                                    <td align="left" valign="middle">

```

<input type="submit" value="Envoyer">

</td>

</form>

</tr>

</table>

</body>

</html>

EXPORT IN CSV

<?php

```
// Ouvre une session
session_start();
```

```
// Définit le séparateur
if ($_POST['separation']=='virgule') { $separateur=','; } elseif
($_POST['separation']=='pointvirgule') { $separateur=';'; }
```

```
// Prépare les titres de la table
$output = "ID".$separateur."overall_CCF".$separateur;
// Ajoute les titres selon le nombre de boucle définies à la page précédente
for ($nb_increase_round = 1 ; $nb_increase_round <= $_POST['count_round'];
$nb_increase_round=$nb_increase_round+1) {
    $output .= "CCF".$nb_increase_round."".$separateur;
}
```

```
// Et ajoute le reste des titres
```

```
$output .=
"CompDepth".$separateur."intarget_depth".$separateur."below_depth".$separa
teur."above_depth".$separateur."CompRelease".$separateur."CompFrequency".$
separateur."intarget_frequency".$separateur."below_frequency".$separateur."
above_frequency".$separateur."time_shock".$separateur."Nb_shock".$separateur
r."time_ventilation".$separateur."Nb_Vent".$separateur."VentVolume".$separ
ateur."intarget_volume".$separateur."below_volume".$separateur."above_volum
e";
$output .= "\n";
```

```
// Prépare les champs de la ligne de la table
```

```
$output .=
"'.$_POST['table_name'].'".$separateur."'.$_POST['overall_CCF'].'".$separateur;
// Ajoute les champs selon le nombre de boucle définies à la page précédente
```

```
for ($nb_increase_round = 1 ; $nb_increase_round <= $_POST['count_round'];
$nb_increase_round=$nb_increase_round+1) {
```

```
    $output .=
"'.$_POST['CCF'][$nb_increase_round].'".$separateur;
}
```

```
// Et ajoute le reste des champs
```

```
$output .=
"'.$_POST['CompDepth'].'".$separateur."'.$_POST['intarget_depth'].'".$separa
teur."'.$_POST['below_depth'].'".$separateur."'.$_POST['above_depth'].'".$se
parateur."'.$_POST['CompRelease'].'".$separateur."'.$_POST['CompFrequency'].'
'".$separateur."'.$_POST['intarget_frequency'].'".$separateur."'.$_POST['belo
w_frequency'].'".$separateur."'.$_POST['above_frequency'].'".$separateur."'.$
$_POST['time_shock_csv'].'".$separateur."'.$_POST['Nb_shock'].'".$separateur.
"'.$_POST['time_ventilation_csv'].'".$separateur."'.$_POST['Nb_Vent'].'".$se
parateur."'.$_POST['VentVolume'].'".$separateur."'.$_POST['intarget_volume'].
"'.$_POST['below_volume'].'".$separateur."'.$_POST['above_vol
ume'].'";
$output .= "\n";
```



```

/*
// Get The Field Name
for ($i = 0; $i < $columns_total; $i++) {
    // $heading = mysql_field_name($sql, $i);
    $heading = (mysqli_fetch_field_direct($sql, $i)->name);
    $output .= ''.$heading.'",';
}
$output .="\\n";

// Get Records from the table
while ($row = mysqli_fetch_array($sql)) {
    for ($i = 0; $i < $columns_total; $i++) {
        $output .= ''.$row["$i"].'",';
    }
    // Enlève le point et l'espace
    $output .="\\n";
}
*/

// Download the file
$filename = "cpr_".$_POST['table_name'].".csv";
header('Content-type: application/csv');
header('Content-Disposition: attachment; filename='.$filename);

echo $output;
exit;

?>

```
