# Supplementary material for: Effect on Chest Compression Fraction of Continuous Manual Compressions with Asynchronous Ventilations Using an i-gel® versus 30:2 Approach during Simulated Out-of-Hospital Cardiac Arrest: Protocol for a Manikin Multicenter Randomized Controlled Trial
Source: Healthcare (Basel). 2021 Mar 20;9(3):354. doi: 10.3390/healthcare9030354 (PMC8003743; doi:10.3390/healthcare9030354)
Supplement: Supplementary file 1 [file healthcare-09-00354-s001.zip]

Archive with 9 entries (9 files):
- Supplementary File S2_English translation of the email sent to potential participants.pdf
- Supplementary File S3_Standard Operating Procedure (French version).pdf
- Supplementary File S4_Standard Operating Procedure (English version).pdf
- Supplementary File S7_PHP code.pdf
- Supplementary File S9_Consent form (English version).pdf
- Supplementary Table S1_SPIRIT Checklist.pdf
- Supplementary Table S5_Demographics data questionnaire.pdf
- Supplementary Table S6_Assessment's questionnaire.pdf
- Supplementary File S8_Consent form (French version).pdf
